# Supplementary material for: Genome-wide association study identifies a major gene for beech bark disease resistance in American beech (Fagus grandifolia Ehrh.)
Source: PubMed Central journal article supplement (PMC5520234; doi:10.1186/s12864-017-3931-z), 2017-07-20

# RNA-seq data quality assessment

1208 Resistant

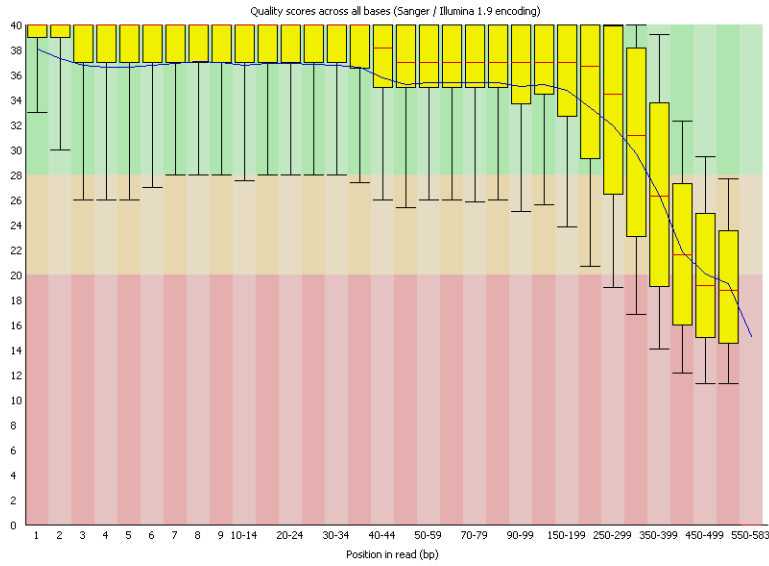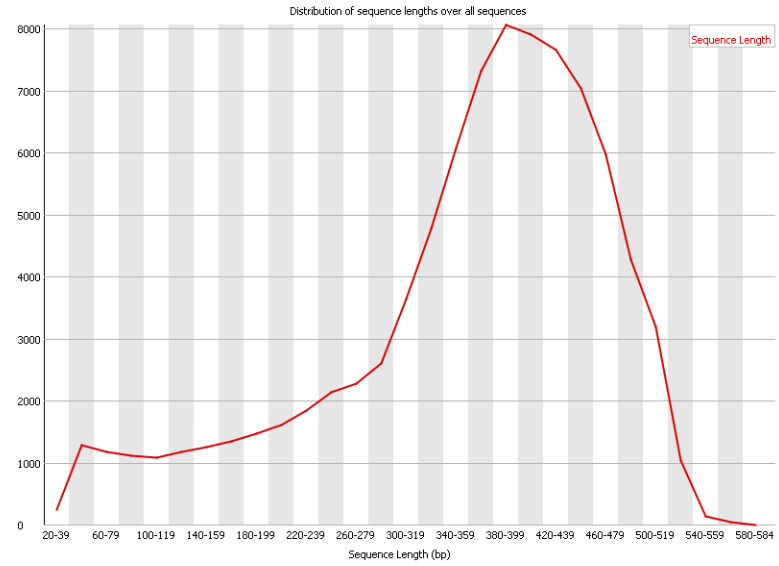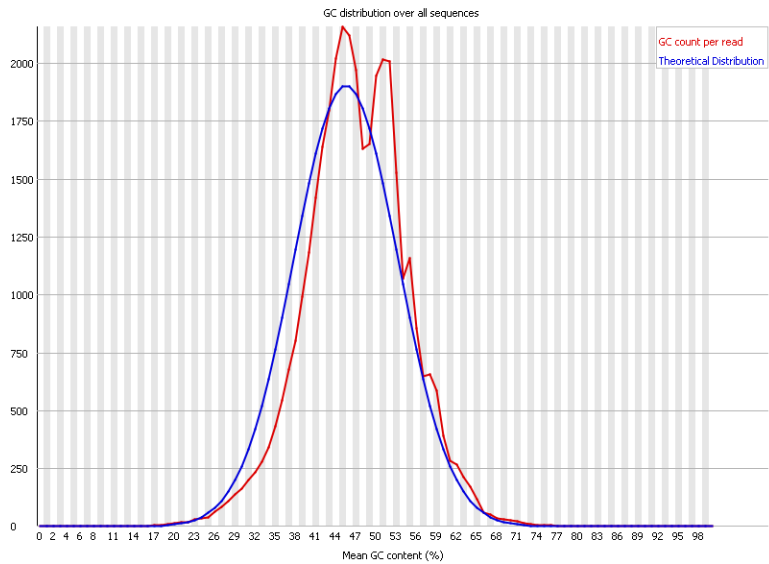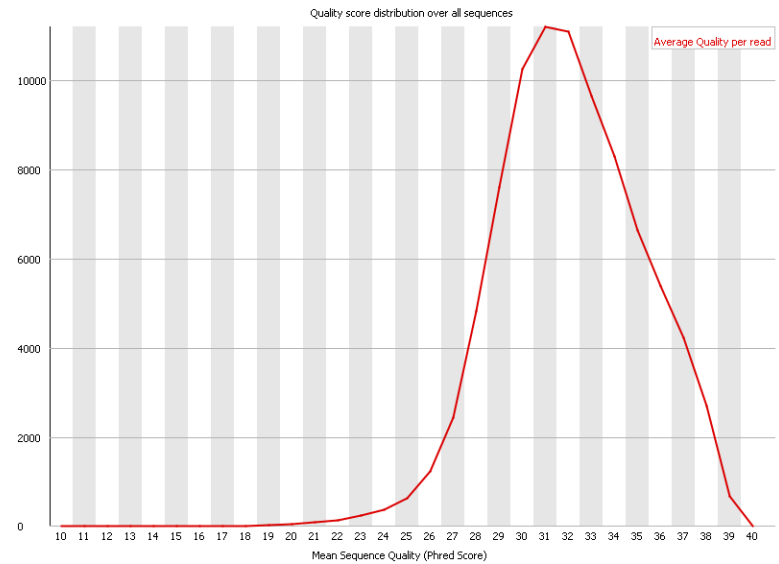

# RNA-seq data quality assessment

1504 Resistant

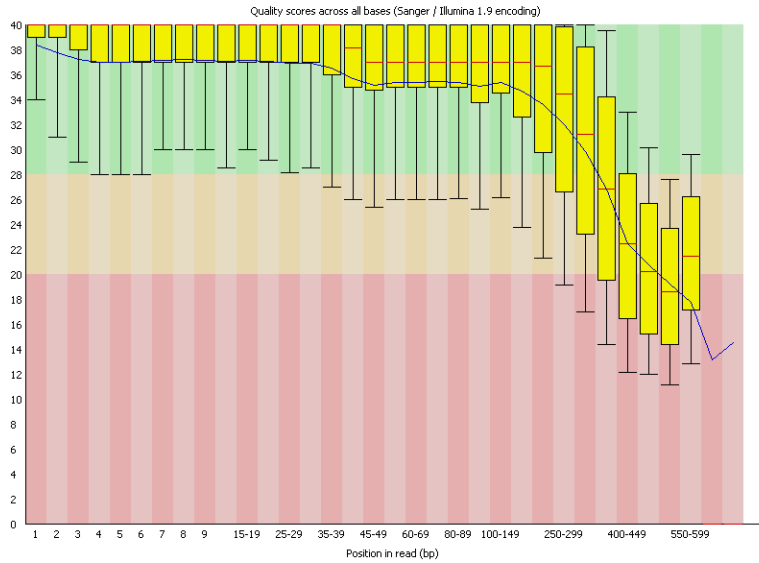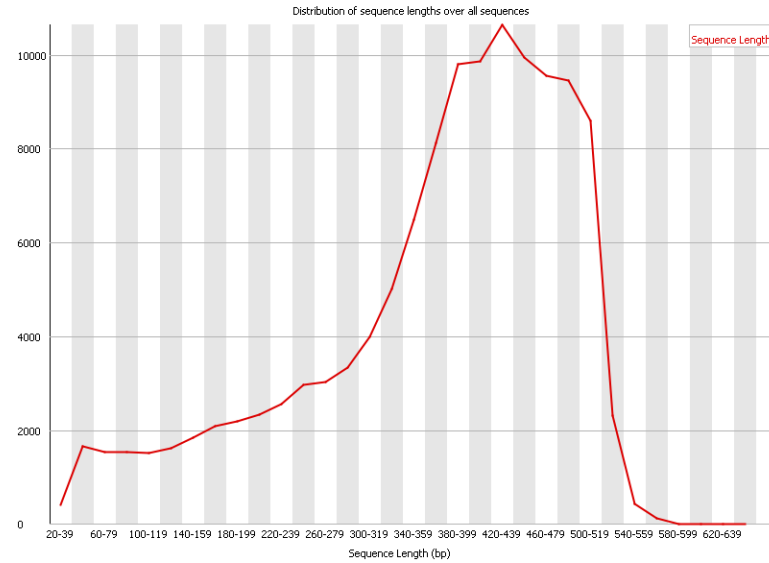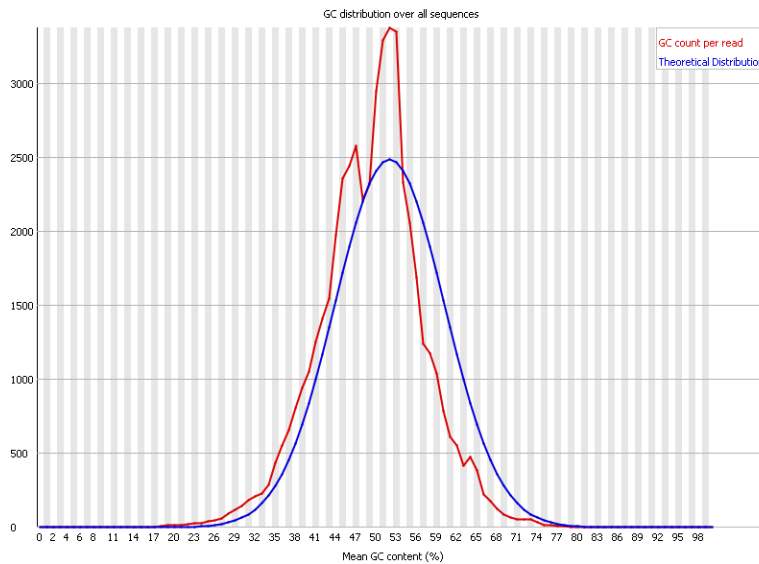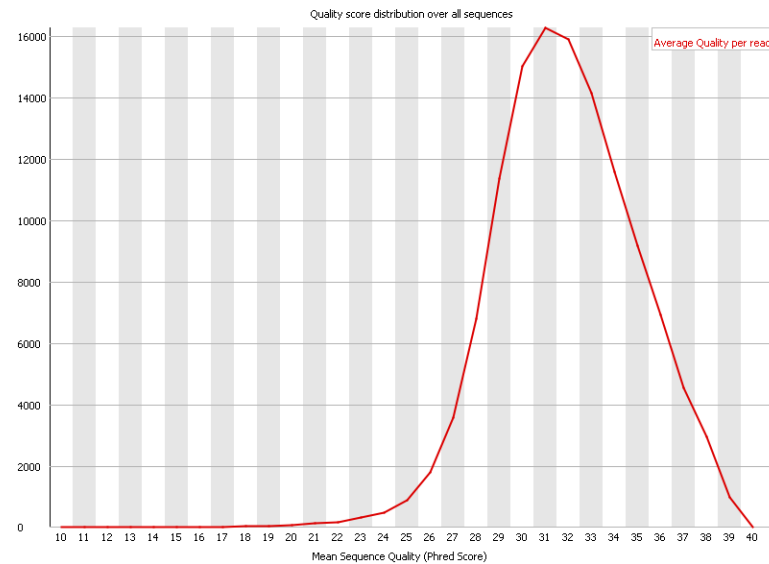

# RNA-seq data quality assessment

2276 Resistant

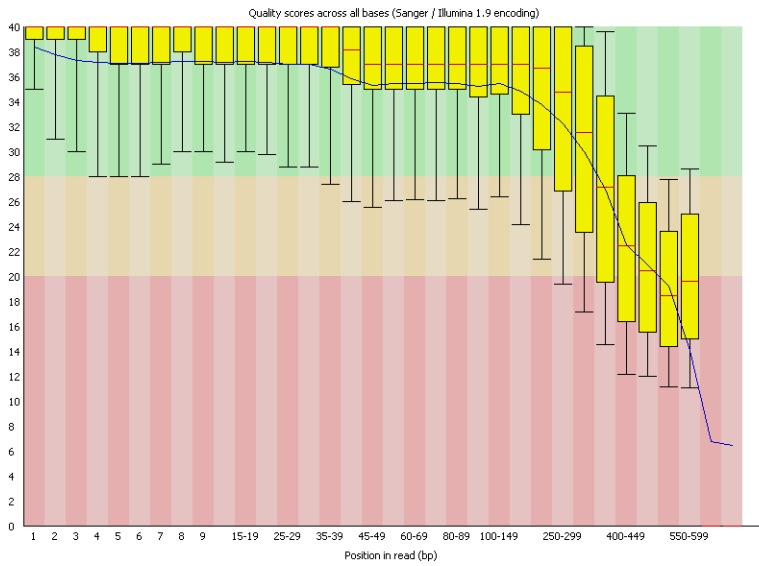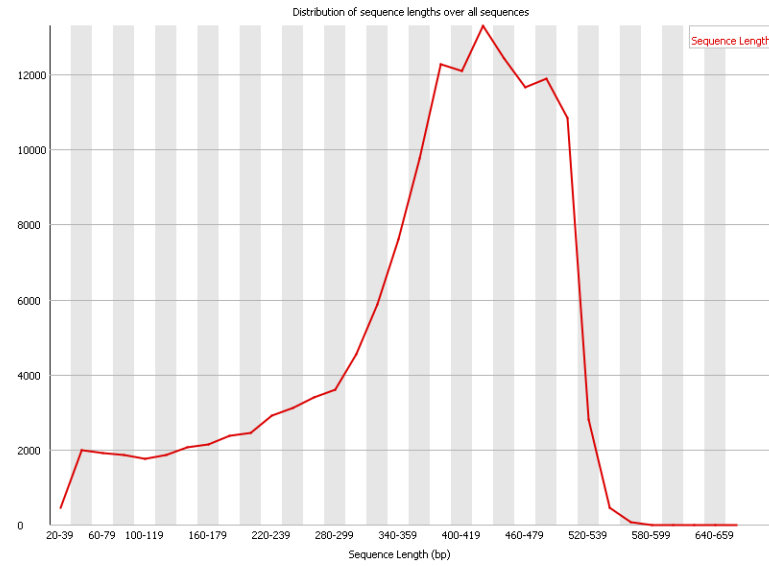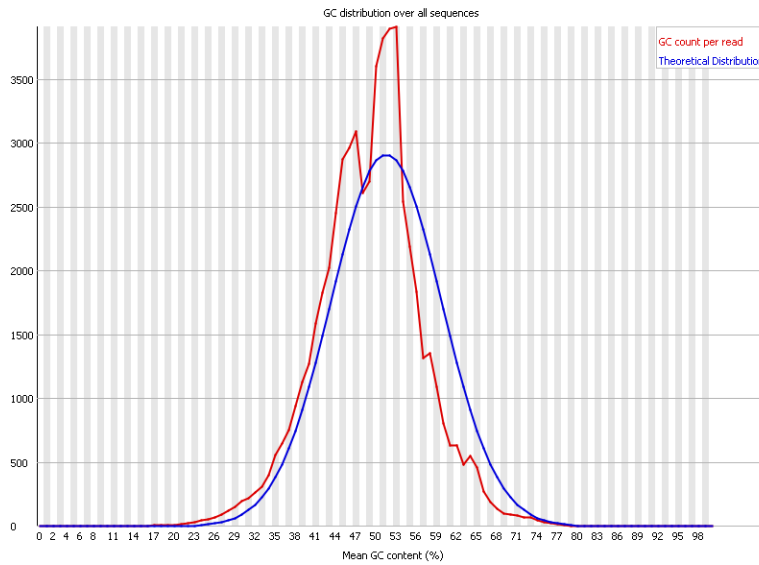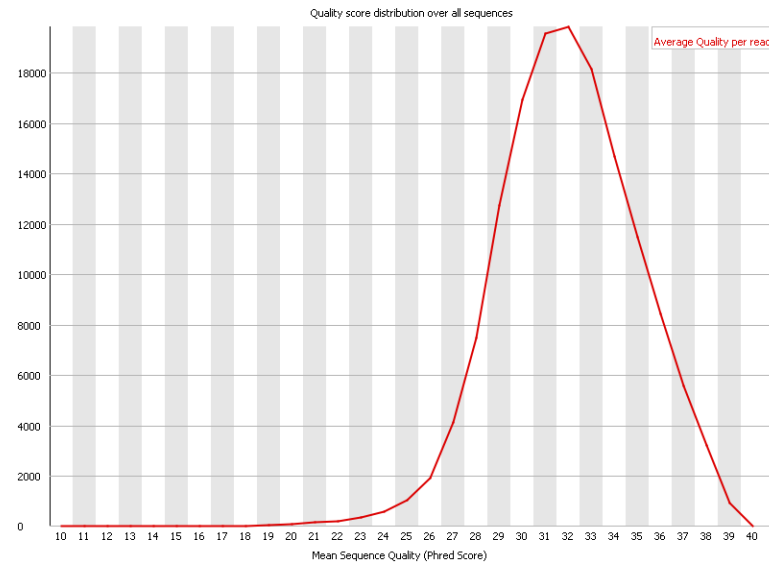

# RNA-seq data quality assessment

1228 Resistant

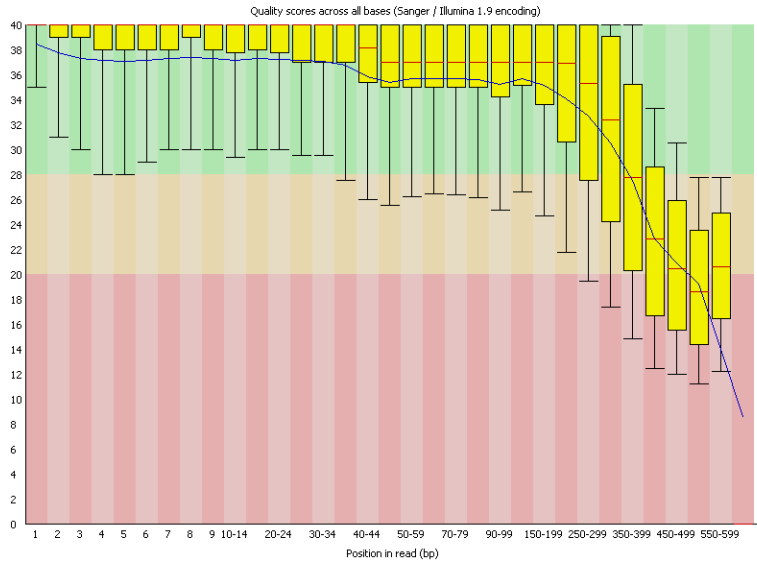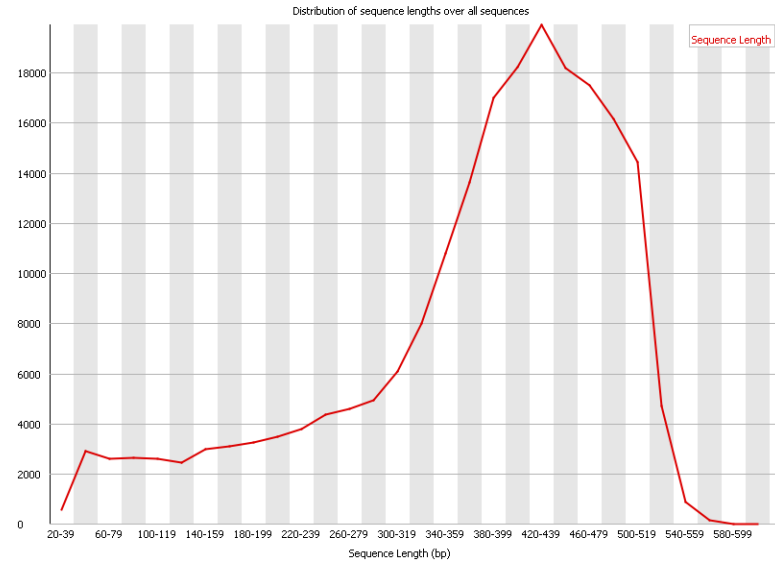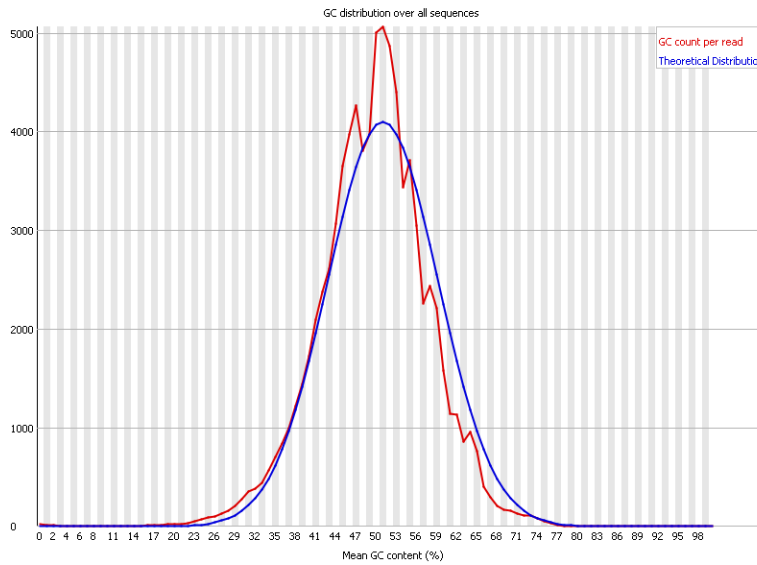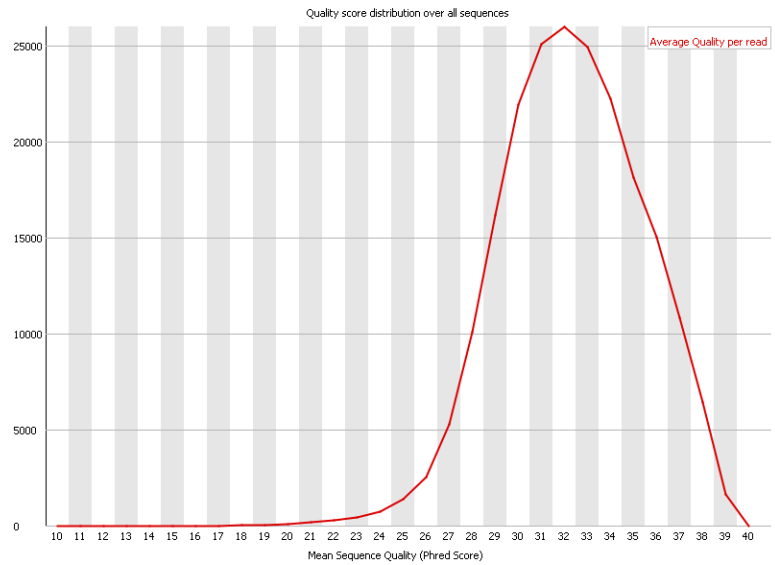

# RNA-seq data quality assessment

2692 Resistant

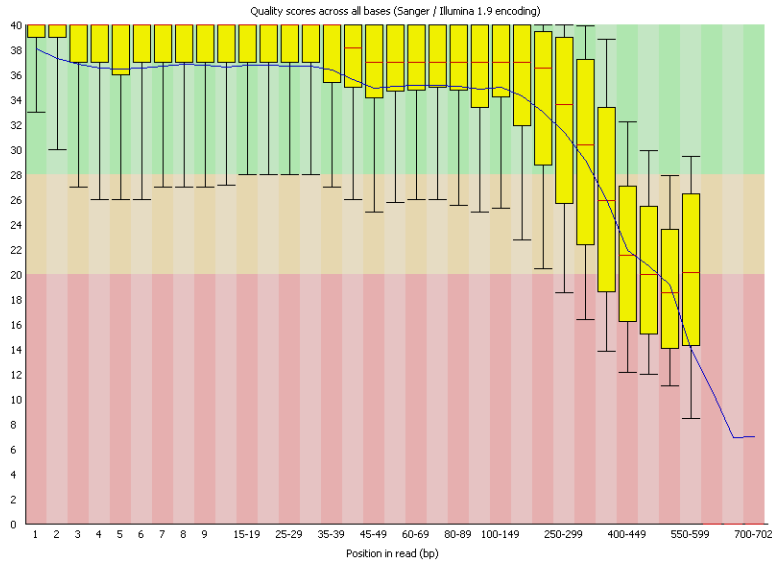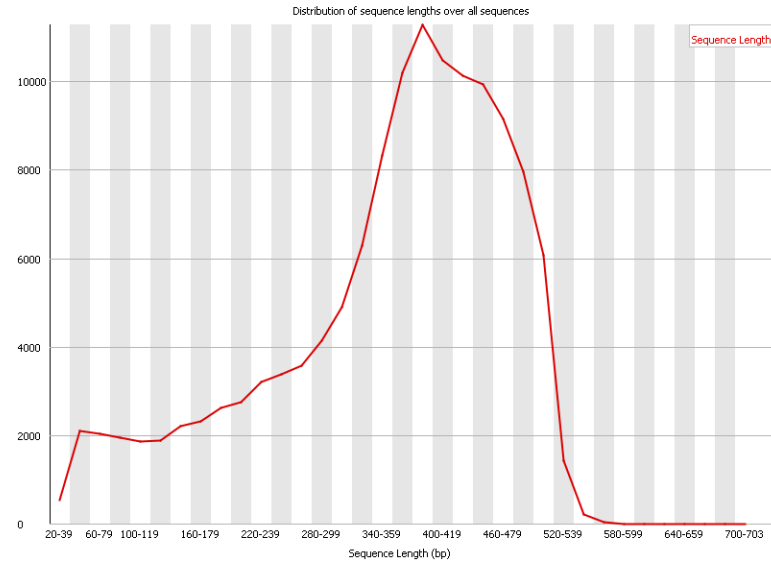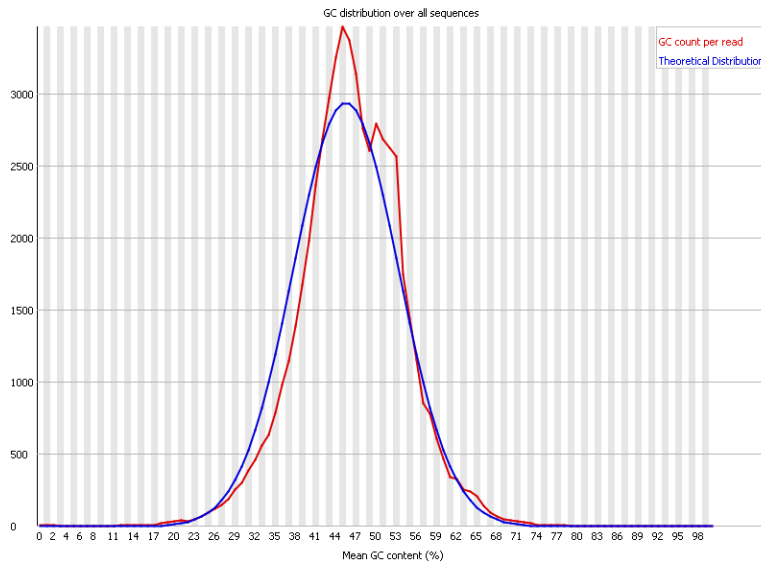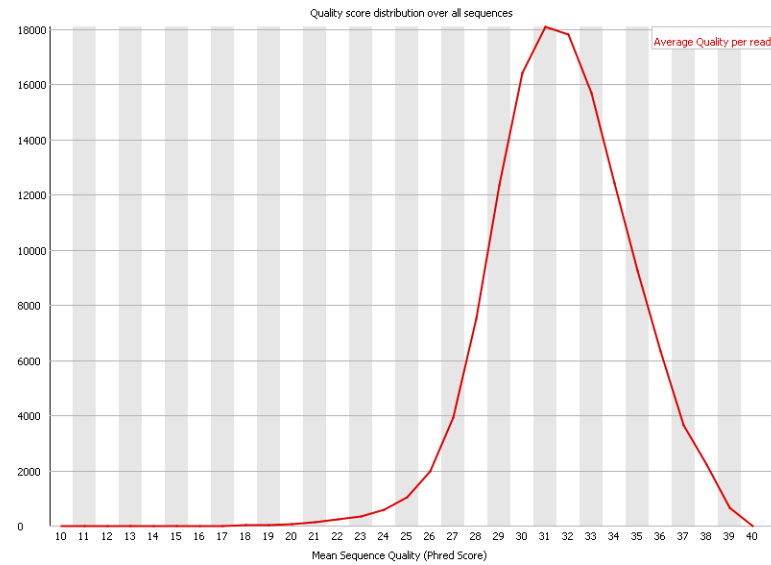

# RNA-seq data quality assessment

2143 Susceptible

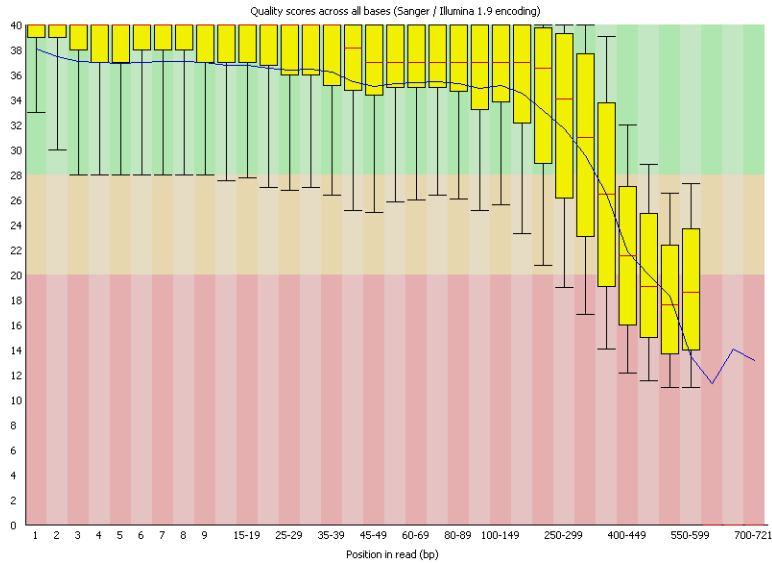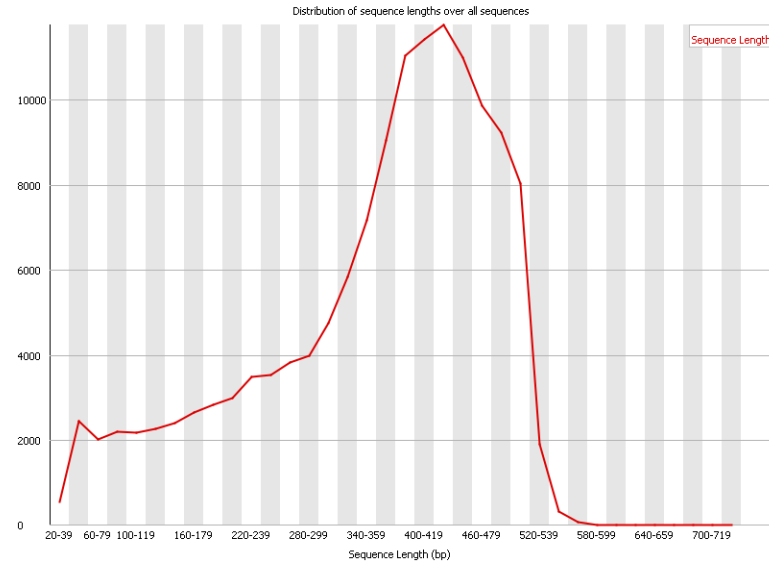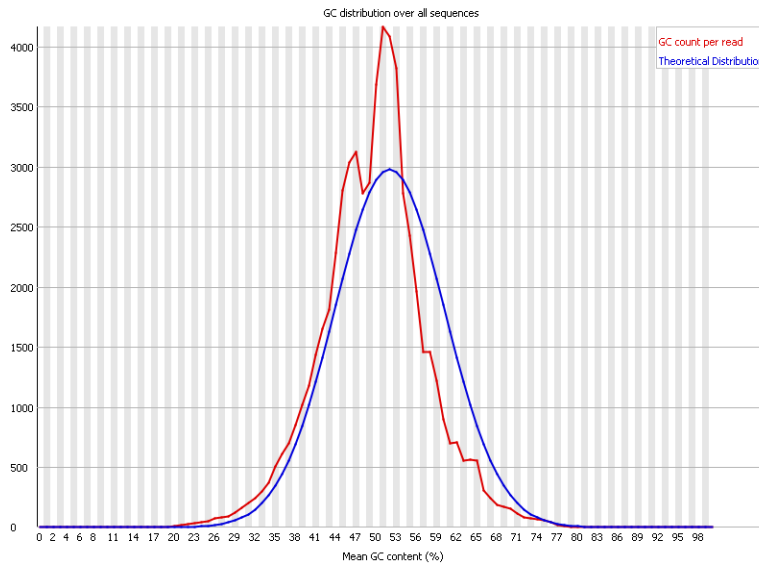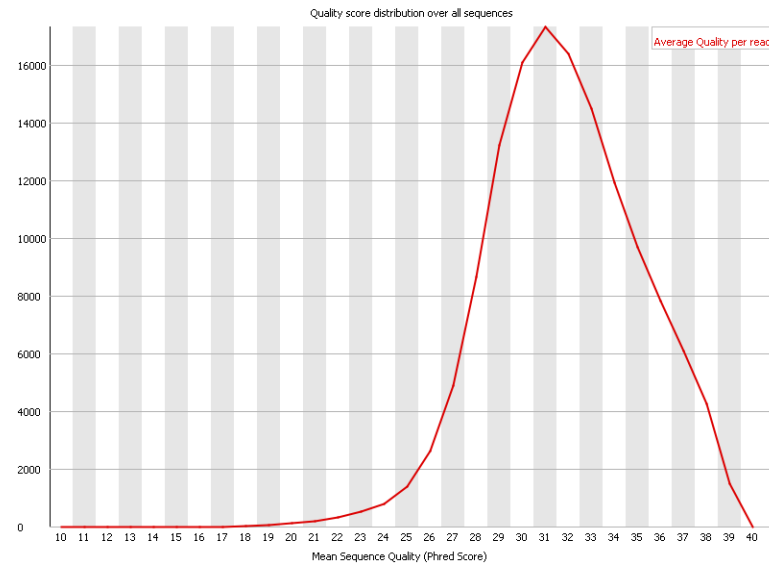

# RNA-seq data quality assessment

1973 Susceptible

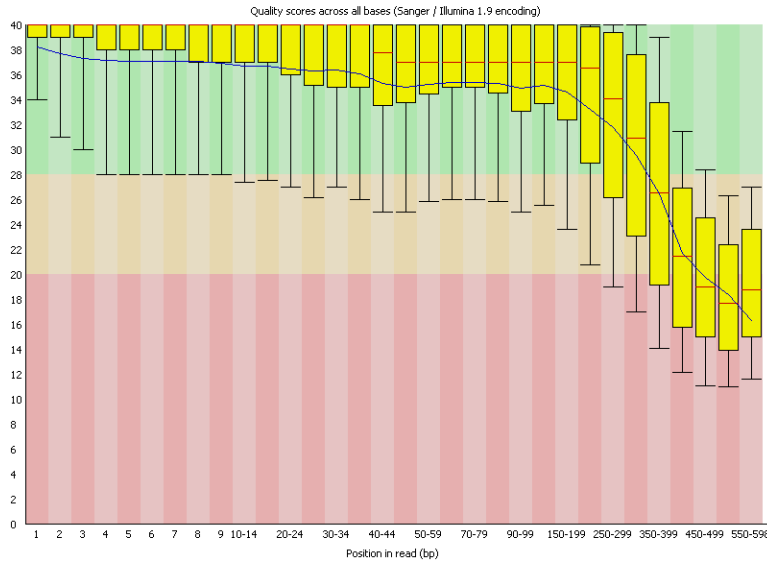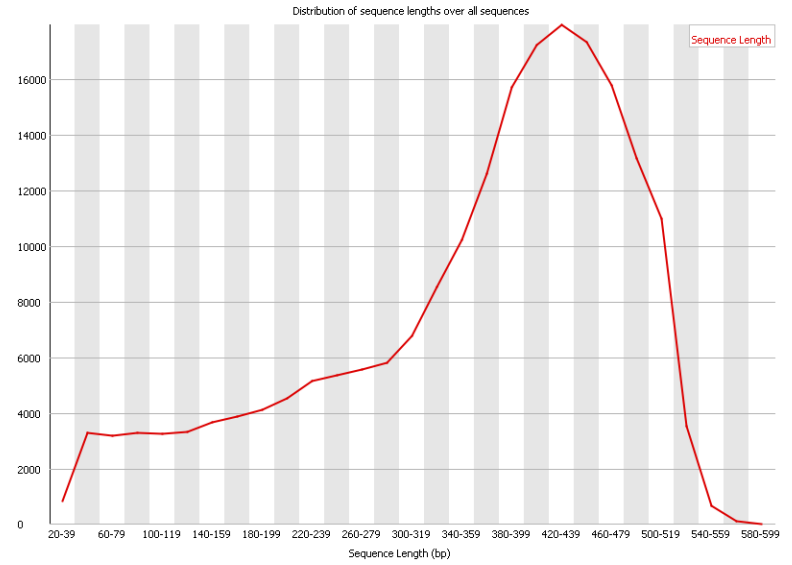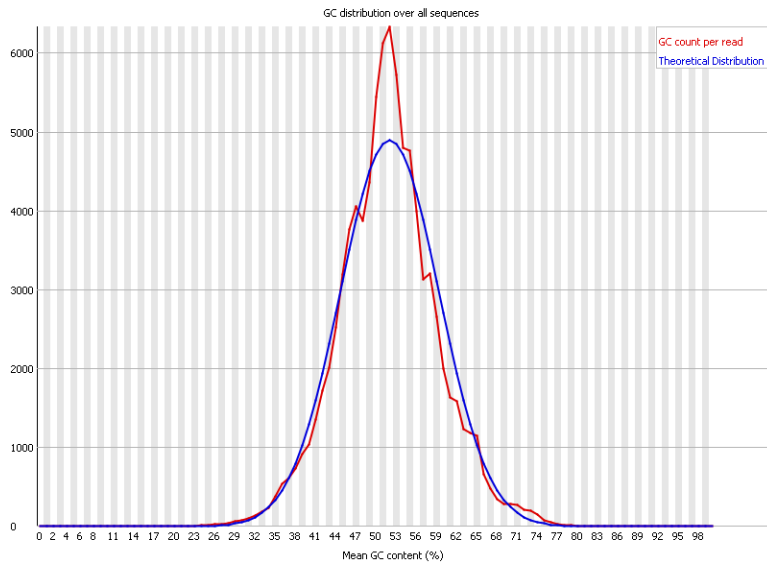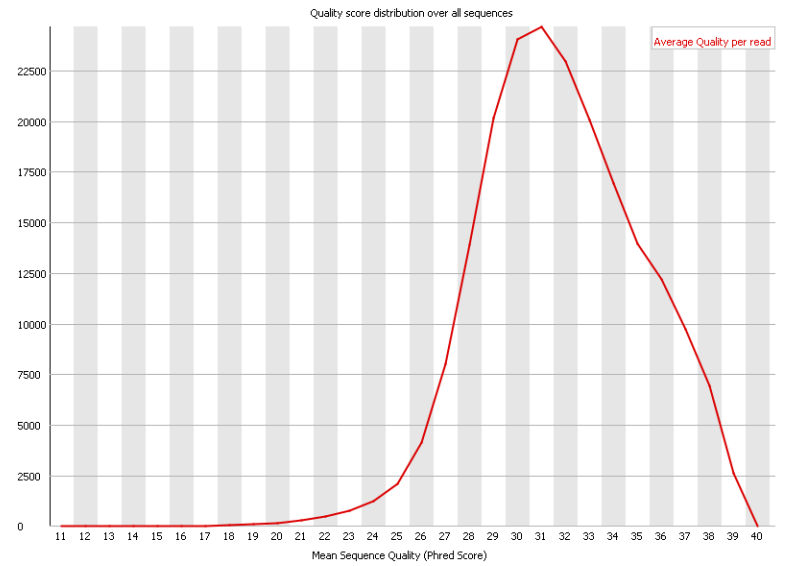

# RNA-seq data quality assessment

3128 Susceptible

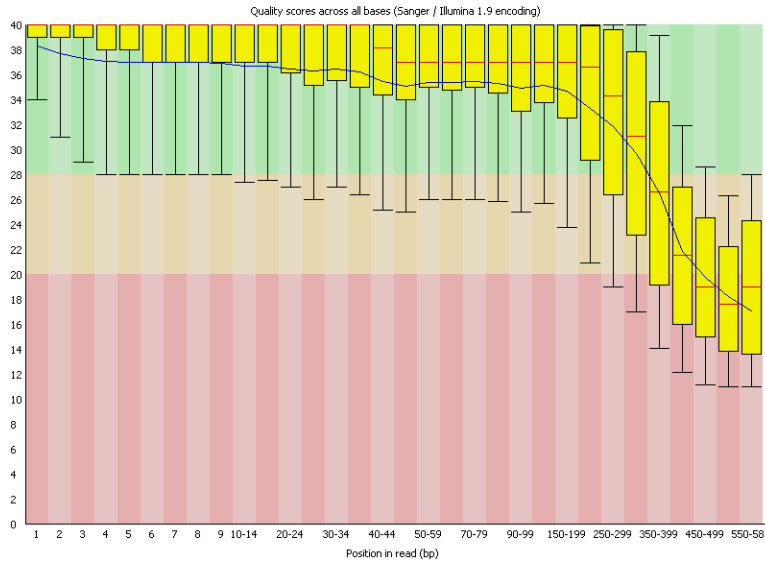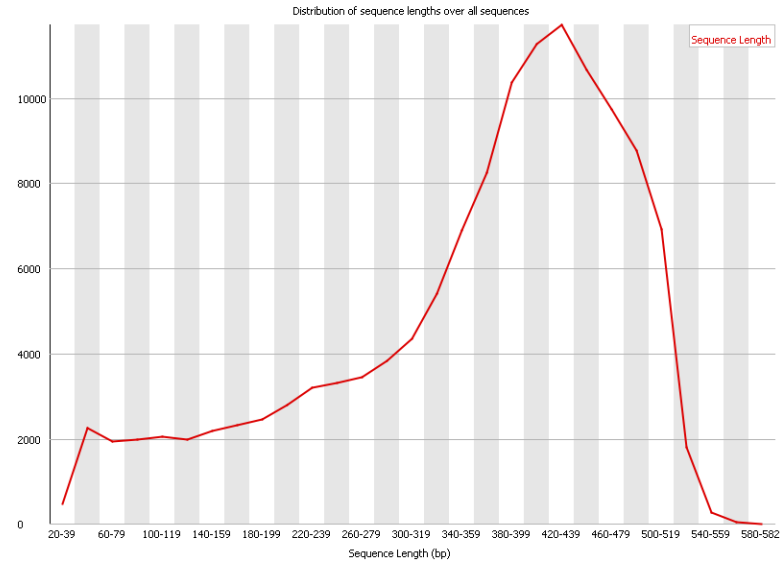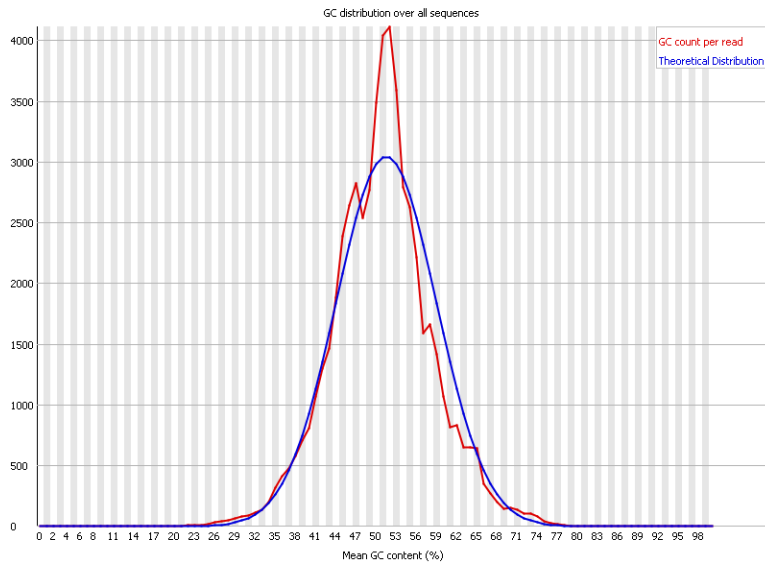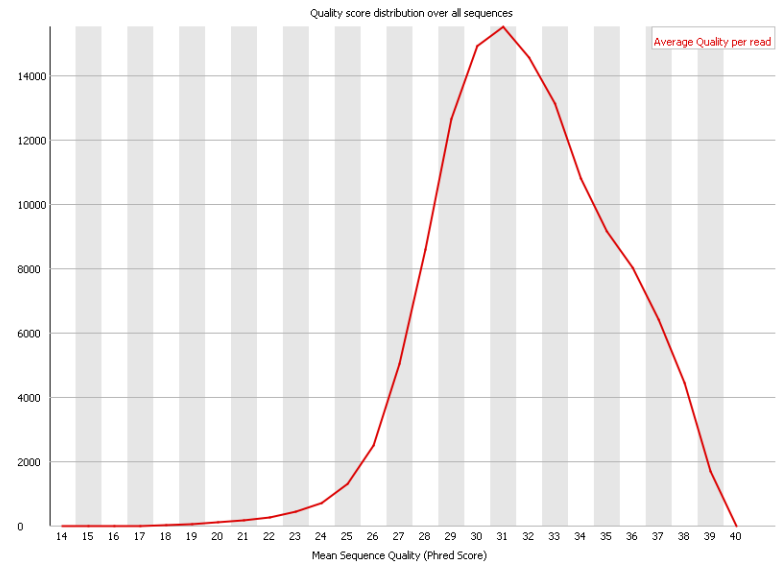



# RNA-seq data quality assessment

DN00726 Susceptible

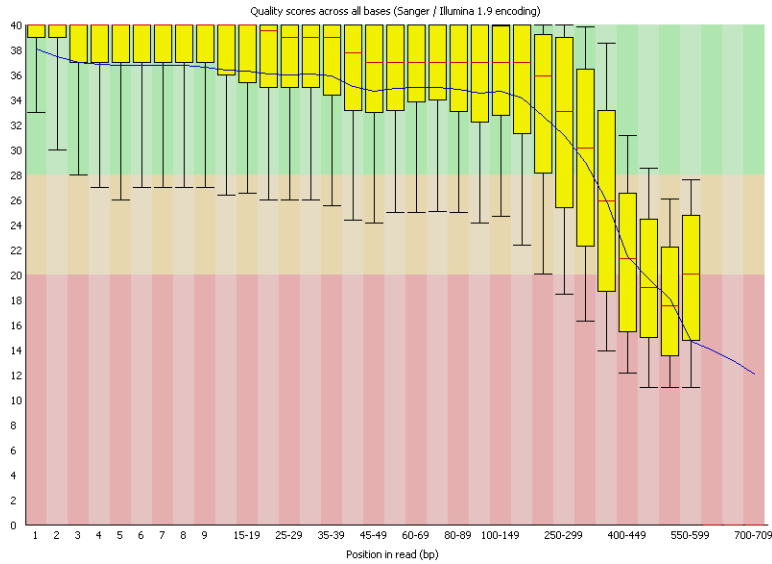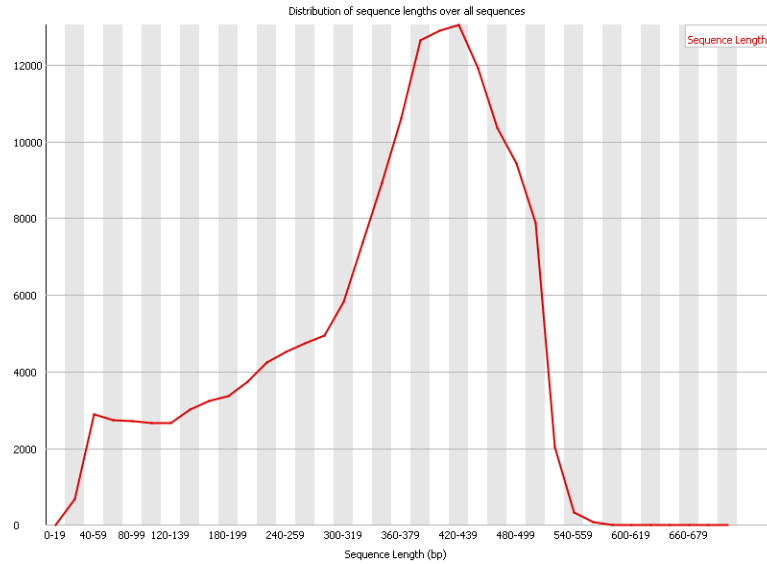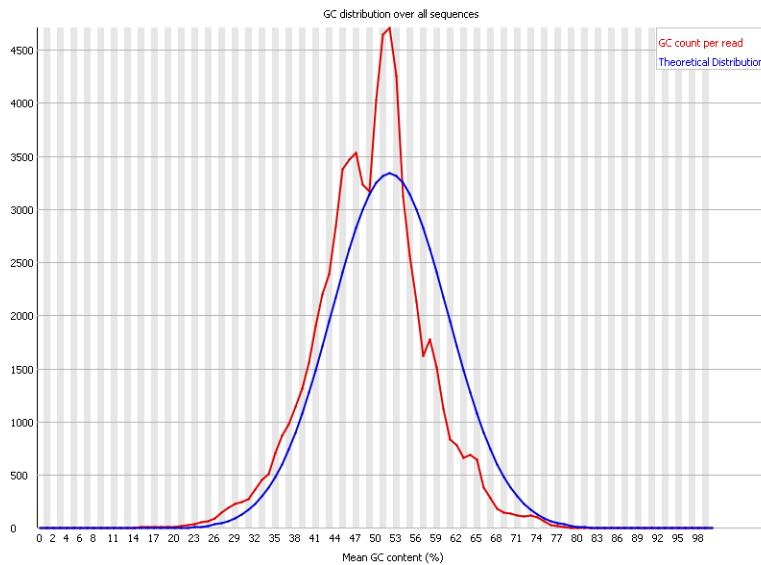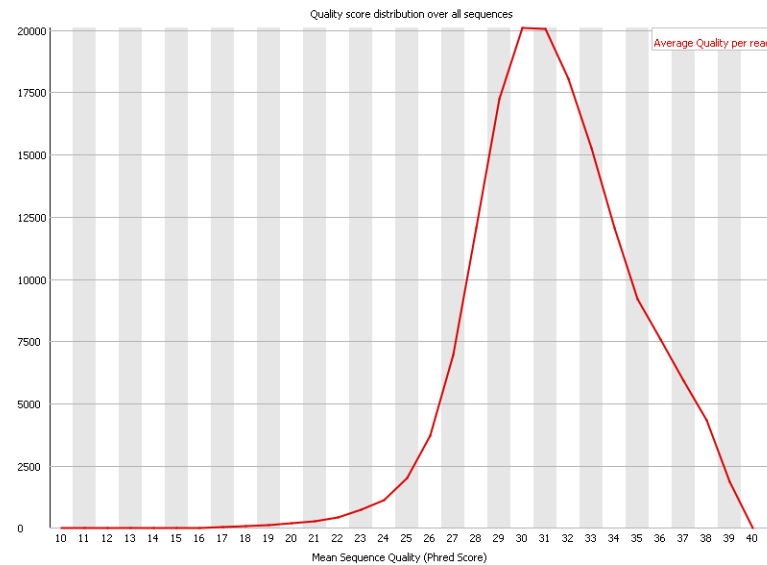

# RNA-seq data quality assessment

Holden Susceptible

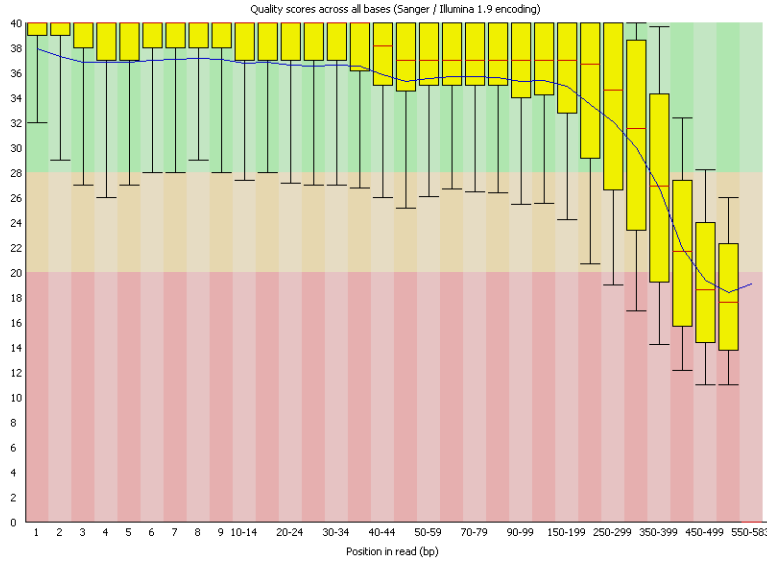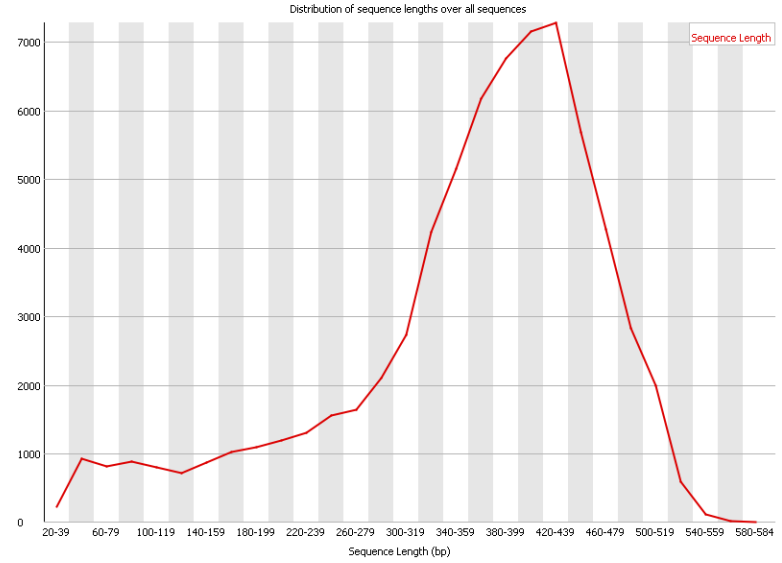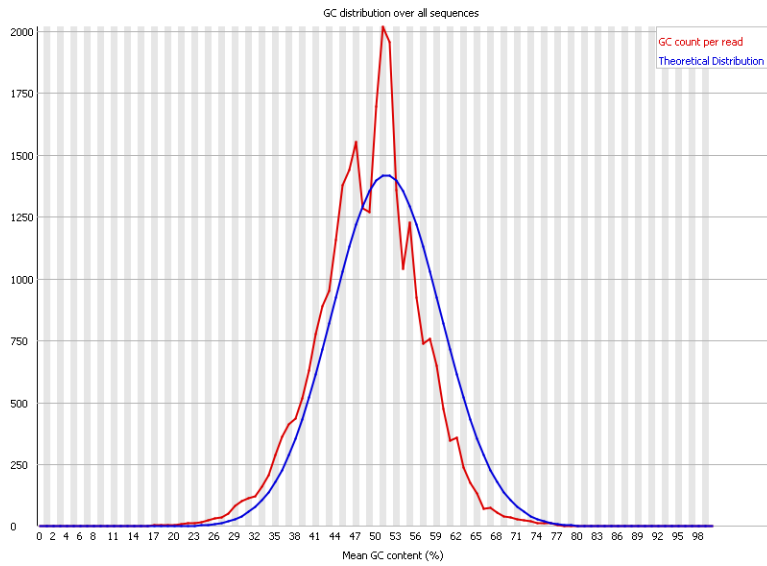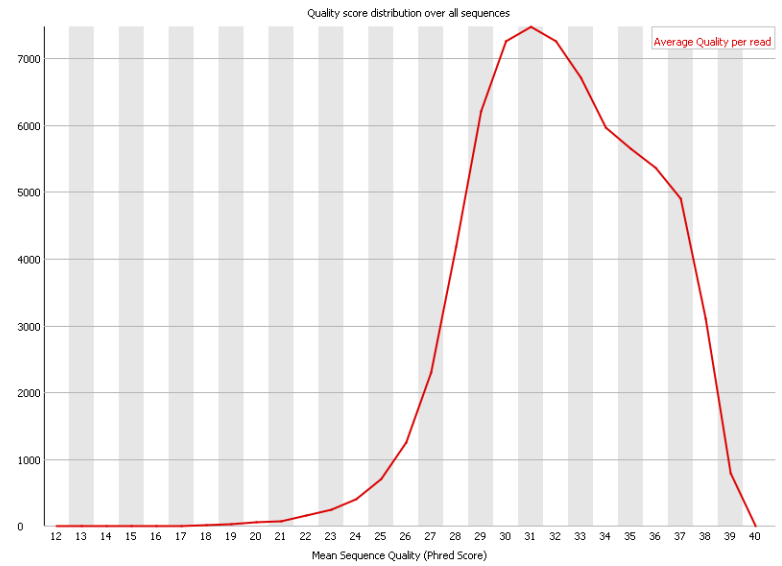

Supplement: 12864_2017_3931_MOESM2_ESM.pdf [file 12864_2017_3931_MOESM2_ESM.pdf]
