# Supplementary material for: Genome-wide association study identifies a major gene for beech bark disease resistance in American beech (Fagus grandifolia Ehrh.)
Source: PubMed Central journal article supplement (PMC5520234; doi:10.1186/s12864-017-3931-z), 2017-07-20

# Examples RNA vs mRNA Agilent Bioanalyzer quality profiles

Total RNA bioanalyzer profiles for samples 1228R and 2143S

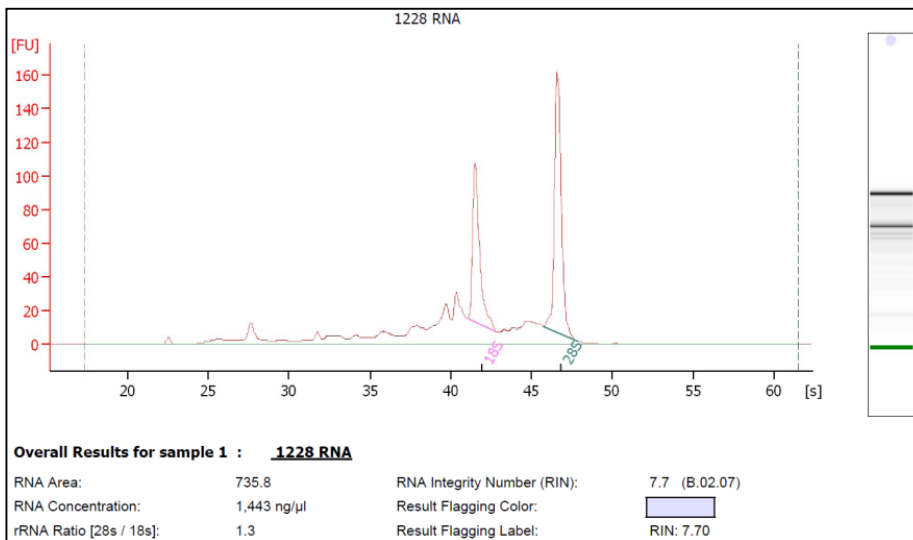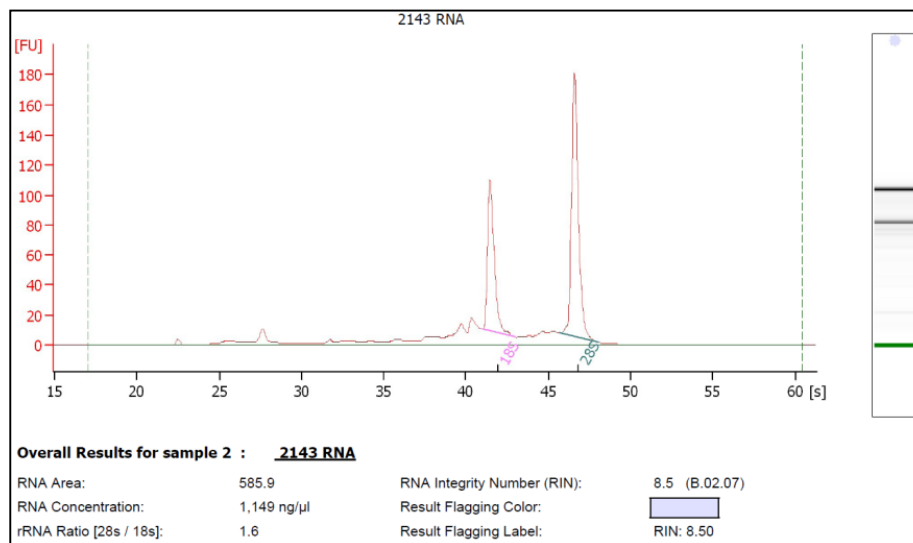

# mRNA bioanalyzer profiles for samples 1228R and 2143S

1<sup>st</sup> Poly-A Elution (100 ul)

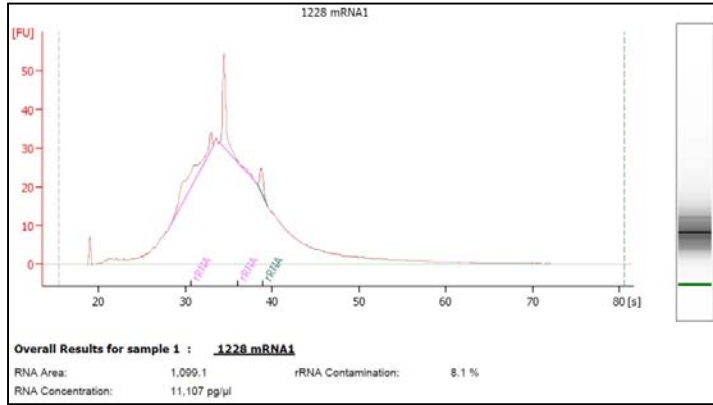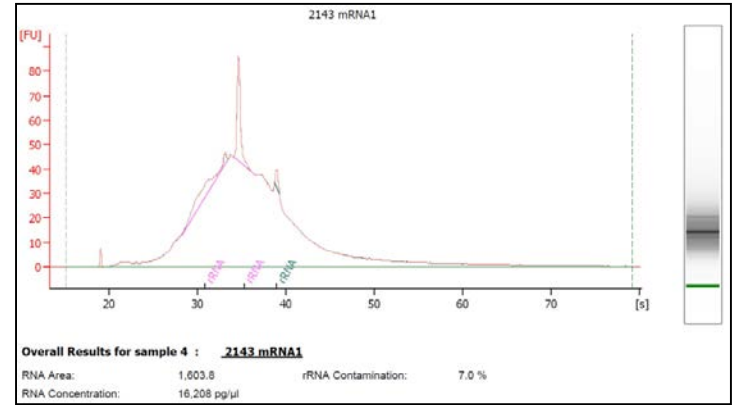

2<sup>nd</sup> Poly-A Elution (100 ul)

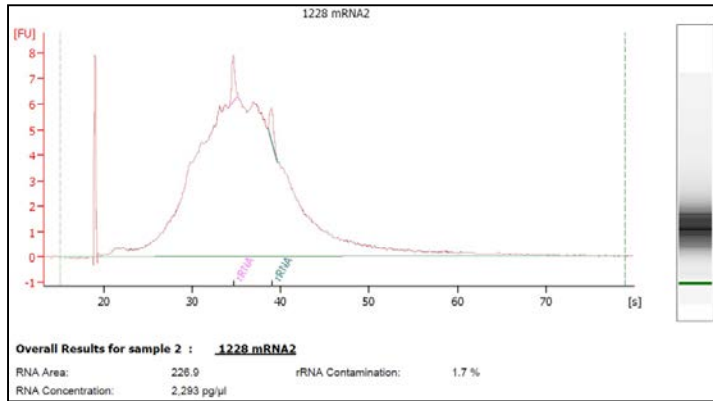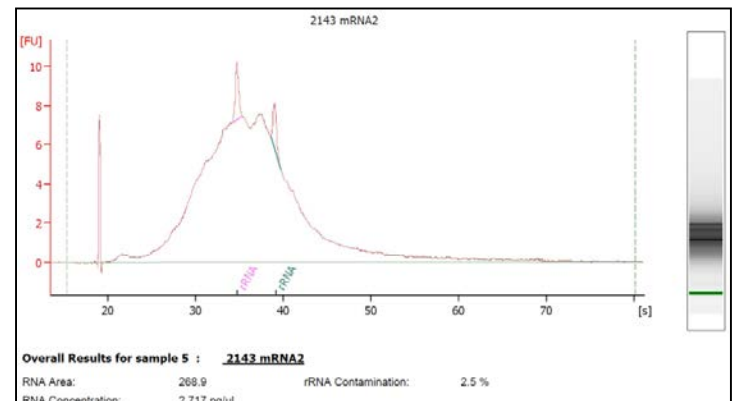

Poly-A 3<sup>rd</sup> Elution (100 ul)

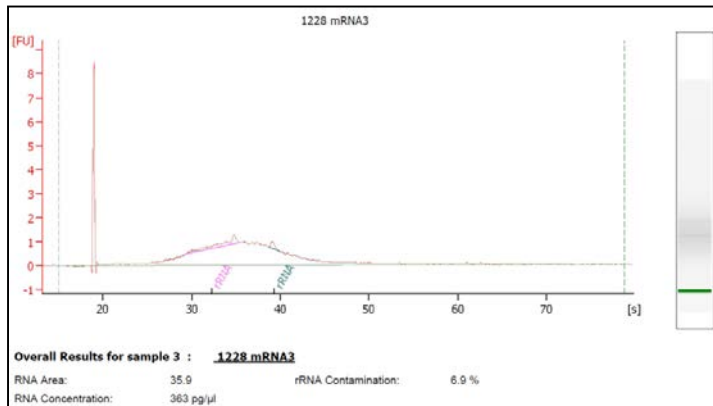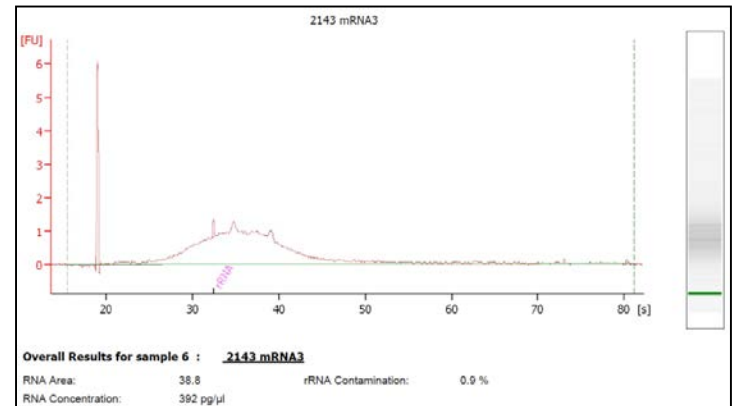

Supplement: 12864_2017_3931_MOESM3_ESM.pdf [file 12864_2017_3931_MOESM3_ESM.pdf]
